# Supplementary material for: Distribution of Wood Pastures in Slovakia—Constraints and Potentials for Restoration of Multifunctional Traditional Land Use Form
Source: MDPI journal article supplement (doi:10.3390/f14010068), 2022-12-29
Supplement: s1 [file s1]

**Table S1.** Typological and production categories of agriculture soils.

| No. | typological and production categories of agriculture soils | Area (ha)<br>within entire districts | percentage (%) of the entire districts | Area (ha)<br>within wood-pasture | percentage (%) of the wood-pasture |
|-----|------------------------------------------------------------|--------------------------------------|----------------------------------------|----------------------------------|------------------------------------|
| 1   | forest                                                     | 827883.73                            | 51.0                                   | 579.16                           | 28.2                               |
| 2   | areas unsuitable for agroecosystems                        | 15465.23                             | 1.0                                    | 60.05                            | 2.9                                |
| 3   | low-yielding permanent grassland                           | 70773.32                             | 4.4                                    | 24.35                            | 1.2                                |
| 4   | medium productive permanent grassland                      | 106339.68                            | 6.6                                    | 344.37                           | 16.8                               |
| 5   | productive permanent grassland                             | 77352.80                             | 4.8                                    | 161.31                           | 7.9                                |
| 6   | low productive fields and productive grasslands            | 32837.45                             | 2.0                                    | 126.75                           | 6.2                                |
| 7   | less productive fields and productive grasslands           | 58062.74                             | 3.6                                    | 134.76                           | 6.6                                |
| 8   | medium production fields and productive grasslands         | 33023.90                             | 2.0                                    | 3.52                             | 0.2                                |
| 9   | low productive arable land                                 | 22471.83                             | 1.4                                    | 58.75                            | 2.9                                |
| 10  | medium to low productive arable land                       | 84297.50                             | 5.2                                    | 269.73                           | 13.2                               |
| 11  | medium productive arable land                              | 105755.92                            | 6.5                                    | 214.73                           | 10.5                               |
| 12  | productive arable land                                     | 140719.63                            | 8.7                                    | 69.78                            | 3.4                                |
| 13  | very productive arable land                                | 34836.62                             | 2.2                                    | –                                | –                                  |
| 14  | highly productive arable land                              | 10423.88                             | 0.6                                    | –                                | –                                  |
| 15  | the most productive soils                                  | 52.16                                | 0.0                                    | –                                | –                                  |
